# Supplementary material for: A supramolecular polymer gel with dual-responsiveness constructed by crown ether based molecular recognition
Source: Royal Society of Chemistry journal article supplement (doi:10.1039/c4py00590b), 2014-01-01
Supplement: c4py00590b1.pdf [file c4py00590b1.pdf]

# **A supramolecular polymer with dual-responsiveness constructed by crown ether based molecular recognition**

Danyu Xia and Min Xue

*Department of Chemistry, Zhejiang University, Hangzhou 310027, P. R. China Fax: +86-571-8795-3189; Tel: +86-571-8795-3189;*

*E-mail: [xuemin@zju.edu.cn](mailto:xuemin@zju.edu.cn)*

## **Electronic Supplementary Information (10 pages)**

1. *Synthesis of monomer 1*

S2

### 1. Synthesis of monomer 1

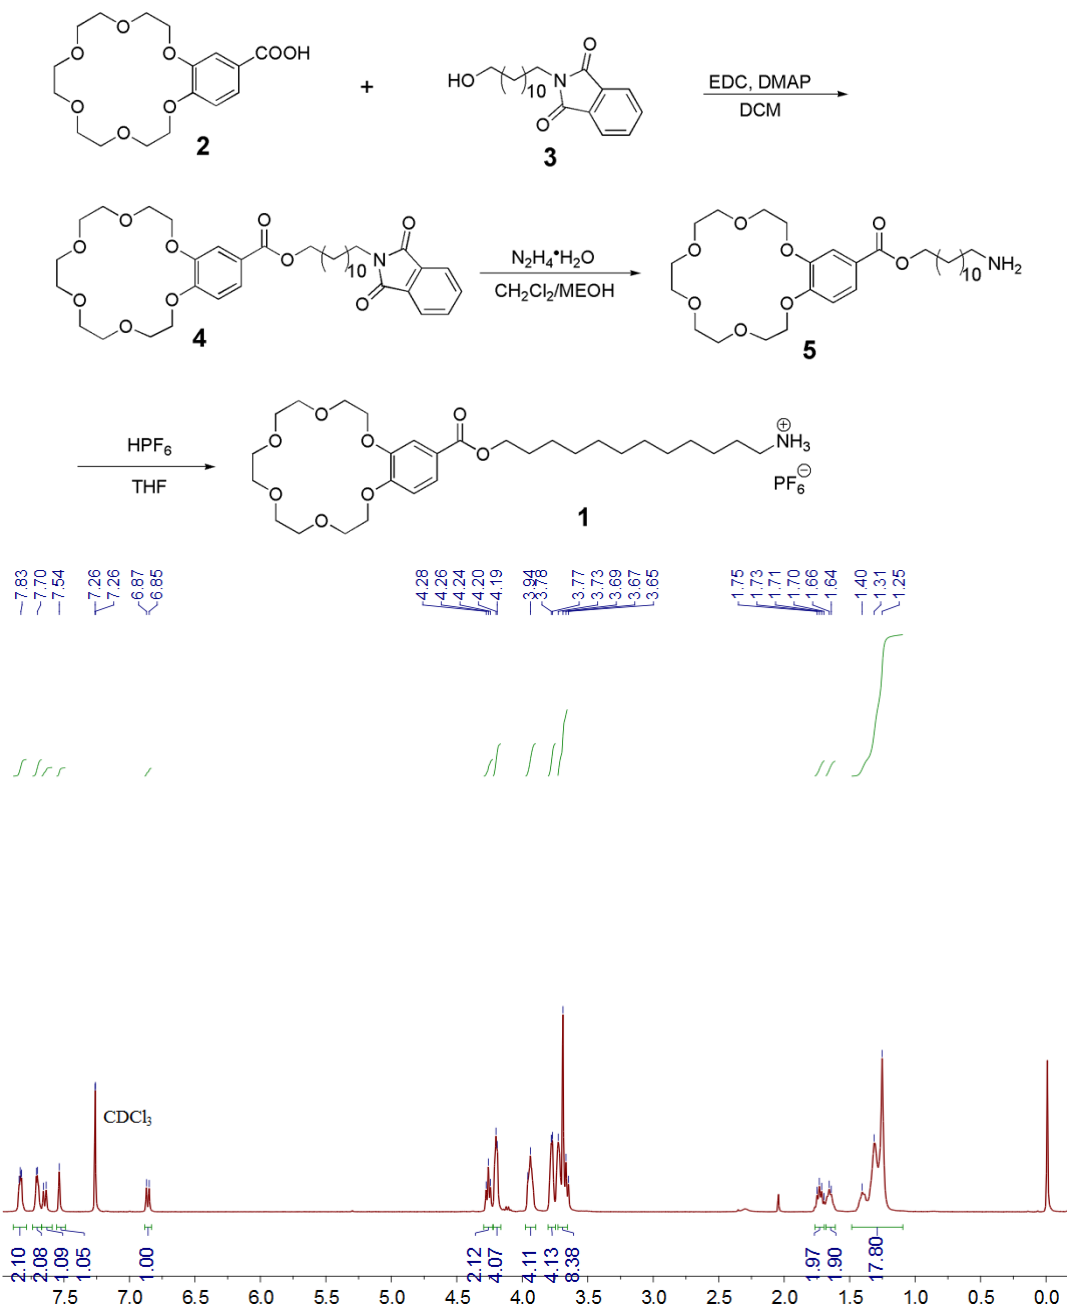

Figure S1.  $^1\text{H NMR}$  spectrum (CDCl<sub>3</sub>, 293 K, 400 MHz) of 4.

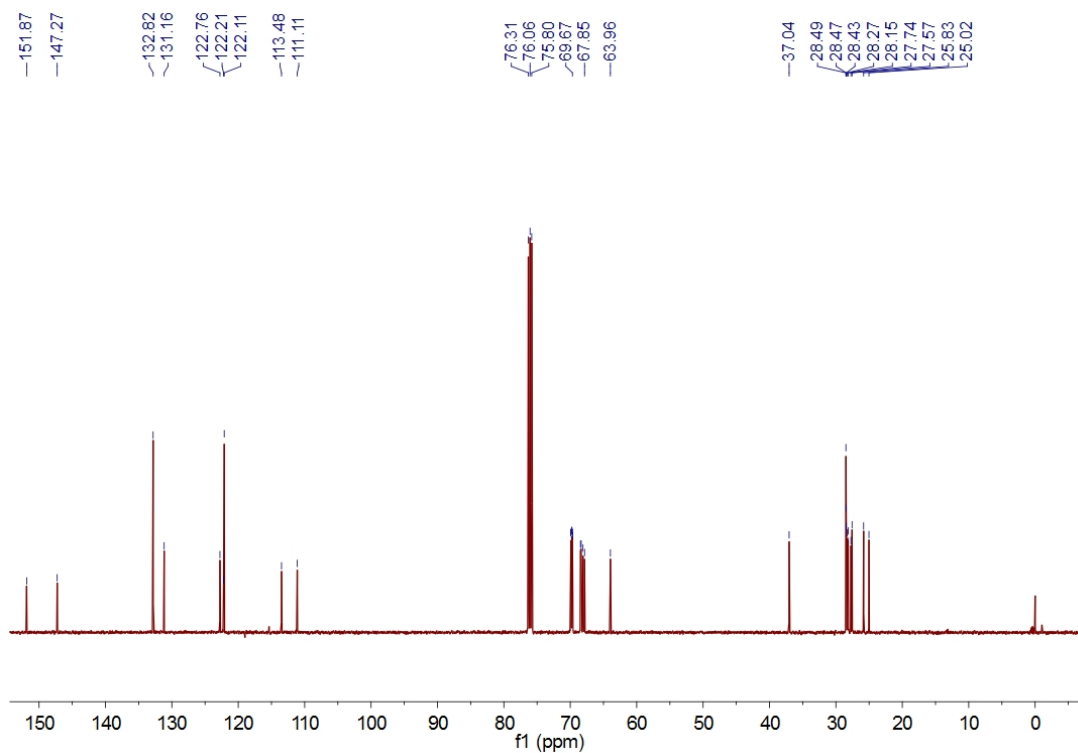

**Figure S2.**  $^{13}\text{C}$  NMR spectrum ( $\text{CDCl}_3$ , 293 K, 125 MHz) of **4**.

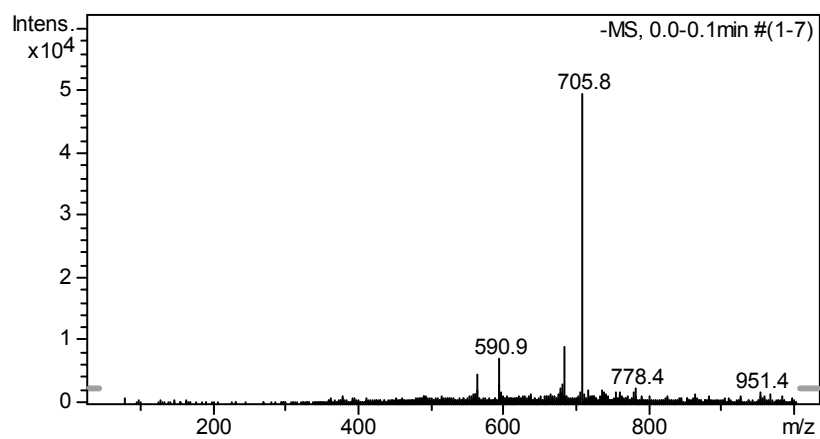

**Figure S3.** Electrospray ionization mass spectrum of **4**. Main peak:  $m/z$  705.8  $[\text{M} + \text{Cl}]^-$  (100%).

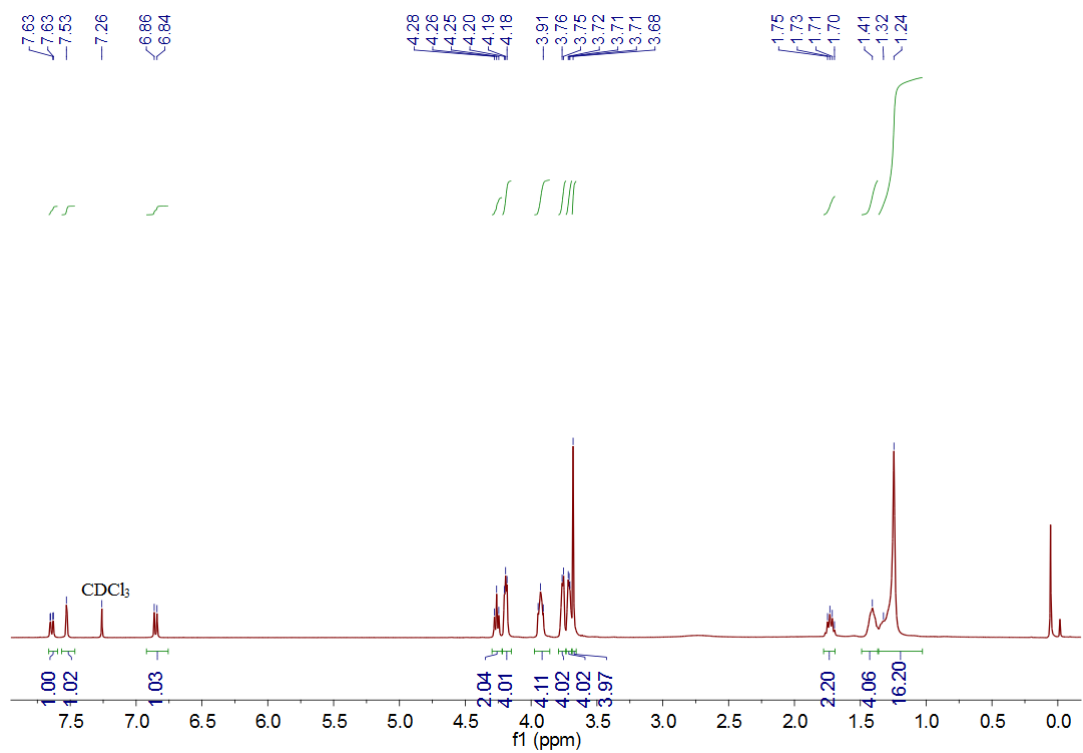

**Figure S4.**  $^1\text{H}$  NMR spectrum ( $\text{CDCl}_3$ , 293 K, 400 MHz) of **5**.

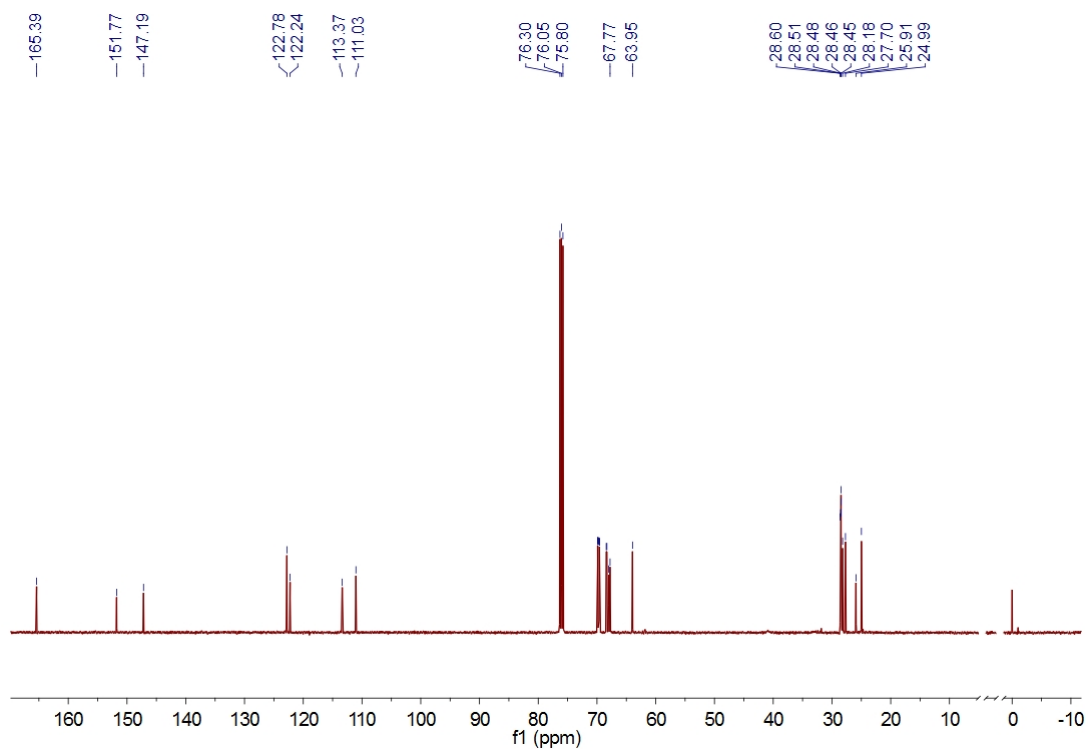

**Figure S5.**  $^{13}\text{C}$  NMR spectrum ( $\text{CDCl}_3$ , 293 K, 125 MHz) of **5**.

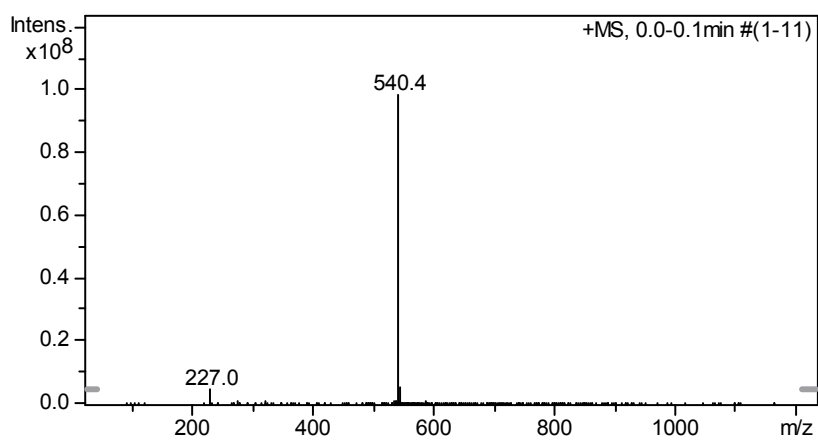

**Figure S6.** Electrospray ionization mass spectrum of **5**. Main peak:  $m/z$  540.4  $[M + H]^+$  (100%).

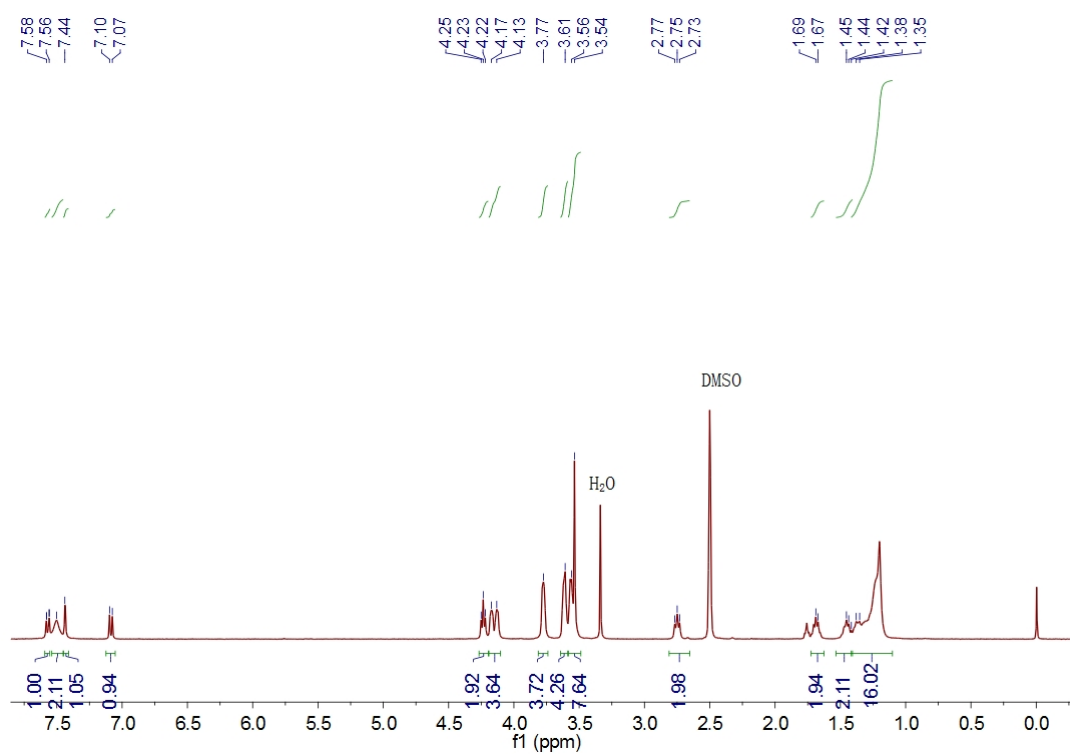

**Figure S7.**  $^1\text{H}$  NMR spectrum ( $\text{DMSO}$ , 293 K, 400 MHz) of **1**.

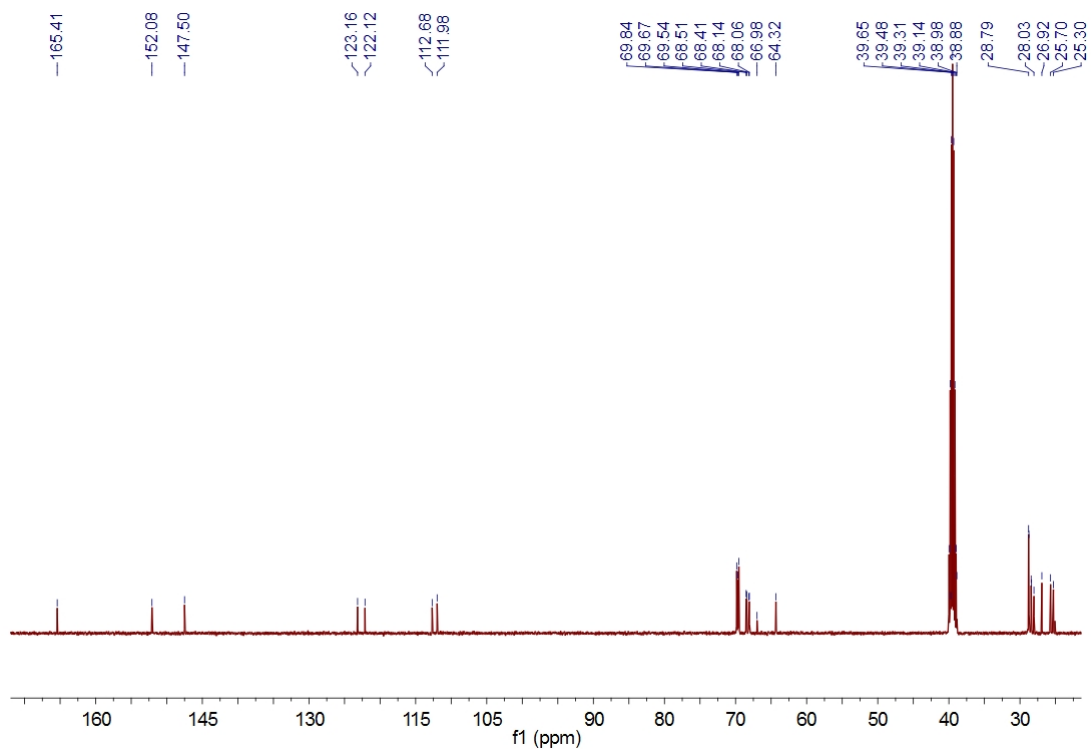

**Figure S8.**  $^{13}\text{C}$  NMR spectrum (DMSO, 293 K, 125 MHz) of **1**.

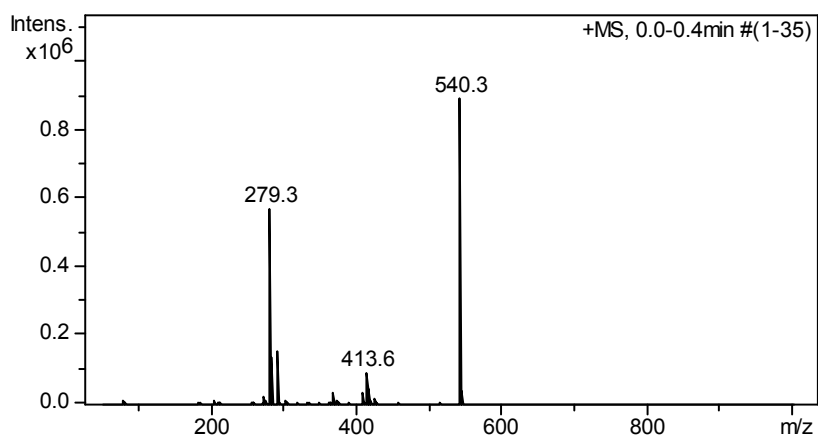

**Figure S9.** Electrospray ionization mass spectrum of **1**. Main peak:  $m/z$  540.3  $[\text{M} - \text{PF}_6]^+$  (100%).
